# Supplementary material
Source: publisher figshare collection journal article supplement (https://tandf.figshare.com/ndownloader/files/40909041)
Supplement: Supplementary file 1 [file 40909041]

## Sheet: Sheet1
Table S2. List of the differentially changed metabolites enriched by KEGG analysis
No.	KEGG number	Compound ID	Compound name	Change fold (log2)
				SS-root	SS-leaf	RI-root	RI-leaf
Metabolites involved in amino acid metabolism by KEGG enrichment
1	K09105	C03794	Adenylosuccinic acid	0	1.55506	1.96527	0
2	K09105	C00334	4-Aminobutyric acid	1.36356	0	0	1.71002
3	K09105	C00331	Indolepyruvate	5.20612	5.96275	5.44057	2.57444
4	K09105	C02220	2-Aminomuconate	2.63647	0	0	2.53589
5	K09105	C04405	(S)-3-Hydroxy-2-methylbutyryl-CoA	0	2.75865	0	0
6	K09105	C01801	Deoxyribose	1.72541	0	0	4.57331
7	K09105	C00719	Betaine	4.60017	3.12372	3.67997	0
8	K09105	C04076	L-Allysine	2.89018	0	1.99349	3.14851
9	K09105	C00510	(9Z)-Octadecenoyl-CoA	1.6494	0	10	2.84646
10	K09105	C16345	N-(17-Hydroxylinolenoyl)-L-glutamine	0	3.53619	3.31349	0
11	K09105	C04785	(9Z,11E,15Z)-(13S)-Hydroperoxyoctadeca-9,11,15-trienoate	0	2.26617	3.16315	0
12	K09105	C16339	(+)-7-Isojasmonic acid CoA	0	2.33633	1.83435	0
13	K09105	C16528	Docosanoyl-CoA	2.14201	0	10	-10
14	K09105	C02515	3-Iodo-L-tyrosine	2.99385	-10	0	0
15	K09105	C05581	3-Methoxy-4-hydroxyphenylacetaldehyde	6.51324	-2.4776	2.35996	-5.87702
16	K09105	C06212	N-Methylserotonin	3.3033	2.66116	3.36537	2.29984
17	K09105	C05659	5-Methoxytryptamine	2.00591	0	0	3.14619
18	K09105	C10164	2-Pyridinecarboxylic acid	5.00192	0	2.53519	0
19	K09105	C05658	Indoxyl	2.41283	3.41112	1.86113	2.18022
Metabolites involved in lipid metabolism by KEGG enrichment
1	K09103	C16526	Icosenoic acid	1.88621	3.86305	1.8012	0
2	K09103	C16169	(4Z,7Z,10Z,13Z,16Z,19Z)-Docosahexaenoyl-CoA	2.5099	2.10834	10	-10
3	K09103	C06428	(5Z,8Z,11Z,14Z,17Z)-Icosapentaenoic acid	1.05955	1.37228	1.19738	-10
4	K09103	C03242	Dihomo-gamma-linolenic acid	-1.8712	-4.00113	-3.33632	-4.29182
5	K09103	C05272	trans-Hexadec-2-enoyl-CoA	0	-1.70009	0	-10
6	K09103	C21959	(10Z,13Z,16Z,19Z,22Z,25Z)-Octacosahexaenoyl-CoA	0	-10	1.81915	-10
7	K09103	C03035	gamma-Linolenoyl-CoA	0	-10	0	-10
8	K09103	C19622	9,10-Dihydroxystearate	-3.22668	4.38721	10	0
9	K09103	C00712	(9Z)-Octadecenoic acid	-4.09726	1.82752	2.08359	1.18097
Metabolites involved in terpenoids and polyketides metabolism by KEGG enrichment
1	K09109	C11636	7-Deoxyloganate	0	4.49745	0	0
2	K09109	C06079	PR-toxin	-10	3.51425	3.02735	1.66962
3	K09109	C01746	Piperidine	3.70693	1.69011	3.80707	5.20624
4	K09109	C05904	Pelargonidin	-10	3.9441	2.2795	1.46492
5	K09109	C05821	Enterochelin	-10	-10	0	-10
6	K09109	C12219	Bacillibactin	0	-2.71643	0	-10
7	K09109	C12216	Mycobactin S	0	-3.07756	10	-10
8	K09109	C01414	Casbene	-10	-10	0	-3.94341
9	K09109	C04718	1,6,6-Trimethyl-2,7-dioxabicyclo[3.2.2]nonan-3-one	0	-1.86631	0	-10
10	K09109	C06425	Icosanoic acid	-2.29591	1.76739	0	0
11	K09109	C05267	3-Oxooctanoyl-CoA	-10	-3.70333	0	-2.98283
12	K09109	C20885	N-Citryl-spermidine	1.86977	-1.80031	0	0
13	K09109	C12221	Myxochelin B	-10	-10	10	1.396
14	K09109	C09627	Capsidiol	-1.28778	-1.91177	-1.69154	0
15	K09109	C01852	Secologanin	-10	0	0	3.2877
16	K09109	C01433	Loganin	2.22303	-10	0	2.272
17	K09109	C00521	(S)-Limonene	-10	2.63091	10	0
18	K09109	C20915	Tabtoxin biosynthesis intermediate 5	3.78901	-10	4.67582	2.95288
Metabolites involved in other secondary metabolites biosynthesis by KEGG enrichment
1	K09110	C05908	Delphinidin	1.3604	1.32384	1.114	2.64516
2	K09110	C15666	7-Glutarylaminocephalosporanate	1.33512	-1.80244	1.11538	1.49591
3	K09110	C02106	(S)-Scoulerine	2.06657	-10	2.81039	-10
4	K09110	C01416	Cocaine	-10	-2.42335	-2.49071	2.5884
5	K09110	C09581	(S)-Magnoflorine	-6.05073	-10	0	1.75687
6	K09110	C05247	10-Hydroxydihydrosanguinarine	-3.15864	-2.4731	2.27298	2.82538
7	K09110	C00355	L-Dopa	-10	-5.33025	-5.14642	-6.02317
8	K09110	C01516	Morphine	-5.00799	-3.95908	-2.3173	-10.3351
9	K09110	C09789	Naringin	-10	-10	0	-10
10	K09110	C09099	Naringenin 7-O-beta-D-glucoside	-10	-10	0	1.33434
11	K09110	C02916	(S)-Norlaudanosoline	-10	-2.97083	0	0
12	K09110	C05190	6-Hydroxyprotopine	-8.22051	-10	0	3.3399
13	K09110	C06173	Thebaine	-10	-10	-1.6818	-10
14	K09110	C09390	Cephaeline	-10	-10	0	-3.81159
15	K09110	C09248	Tubulosine	0	-10	10	0
16	K09110	C07592	Colchicine	0	-10	0	2.86522
17	K09110	C09337	Ankorine	-10	-2.5021	0	-10
18	K09110	C00822	Dopaquinone	-6.4478	-6.22195	-3.50225	1.37122
19	K09110	C03005	N-Methylanthranilate	-5.33231	-3.14106	-2.17965	1.14901
20	K09110	C16369	Cyanidin 3-(6-p-caffeoyl)glucoside	-10	-10	-6.39203	1.78529
21	K09110	C12140	Malvidin-3-glucoside	-10	-10	-6.81898	1.03362
22	K09110	C05587	3-Methoxytyramine	-3.90705	-4.78104	-3.42832	1.72469
23	K09110	C00049	L-Aspartate	-5.86946	-10	-3.42749	1.37819
24	K09110	C00019	S-Adenosyl-L-methionine	-10	-10	-6.12954	3.30903
